# Supplementary material for: Promoter cross-talk via a shared enhancer explains paternally biased expression of Nctc1 at the Igf2/H19/Nctc1 imprinted locus
Source: PubMed Central journal article supplement — Nucleic Acids Res. 2012 Dec 4;41(2):817–26. doi: 10.1093/nar/gks1182 (PMC3553941; doi:10.1093/nar/gks1182), 2012-12-04

## Supplemental Table 1

### Primers used in cDNA quantitation

|             |                                                        |
|-------------|--------------------------------------------------------|
| H19         | 5'-TGAGTTTCTAGGGAGGGAG<br>5'-ATTCCTGAGGCAGGTAGTG       |
| Igf2        | 5'- GAGCTTGTTGACACGCTTC<br>5' ACGTTTGGCCTCTCTGAAC      |
| Nctc1mRNA   | 5'- CAACTCCTACCACCAAAGCA<br>5'-TCCATCTCCCTTGCTGTATC    |
| Nctc1 hnRNA | 5'- CCCTATCTGCAATGTTTTCT<br>5'-GAATGGTGCGTATTGTTGCTA   |
| GAPDH       | 5'- CCTTCATTGACCTCAACTACAT<br>5'- CAAAGTTGTCATGGATGACC |

### Primers used in ChIP analysis

|                  |                                                             |
|------------------|-------------------------------------------------------------|
| Nctc1 Exon1      | 5'- ACATTCAGGCAGTGACCAAT<br>5'- GCTCCGACCTGAATATCTTG        |
| Enhancer         | 5'- AGGAGCAGCTGTTCTCCTCATCTT<br>5'- ACAAGTGGCCATGTCCTCCTCAA |
| Negative control | 5'- GGTCCGATCTAAGCCCTAGCATT<br>5'- TTCCTGGCACTAGCCAGTCTCTTT |

### Primers used in DNA melting Analysis

|             |                                                         |
|-------------|---------------------------------------------------------|
| Nctc1 hnRNA | 5'-GGTCATGAGTGAGACACCAGTC<br>5' – GAATGGTGCGTATTGTTGCTA |
| Enhancer    | 5'- CCCTATCTGCAATGTTTTCT<br>5'- GAATGGTGCGTATTGTTGCTA   |
| Nctc1 Exon1 | 5'- ACATTCAGGCAGTGACCAAT<br>5'- GCTCCGACCTGAATATCTTG    |

**Primers used in 3C analysis (see also Fig. S1)**

|          |                               |
|----------|-------------------------------|
| Primer 1 | 5'-CACTAAATCCTGGGTGTCTAT      |
| Primer 2 | 5'-GCCATTCTCCTGGGATTAGG       |
| Primer 3 | 5'-CAGGTGGAAAGAGCTCTTAGAGA    |
| Primer 4 | 5'-ACAGAAGGGCAGTCATCCAG       |
| Primer 5 | 5'-CTGTACCCGGAACAAGTTAGC      |
| Primer 6 | 5'-GGGAATGCTGTCCTCTGAATTAATAG |
| Primer 7 | 5'-ATCTTGGGATCATGCAGAGAG      |
| Primer 8 | 5'-CAGGCATGGTAGAACATGCTC      |

**Primers used for Bisulfite Sequencing**

*Nctc1-Pr-Meth-For1* 5'-TTG ATT TGT TTT GAG TTG GTT-3'

*Nctc1-Pr-Meth-Rev1* 5'-AAT TAT ATC CCT TCT TCT TAA TCC-3'

*Nctc1-Pr-Meth-For2* 5'-TTG TTT TGG TGG TAG GAG TTG A-3'

*Nctc1-Pr-Meth-Rev2* 5'-TTT CCC CAA CCT AAA CAA ACT-3'

*Nctc1-En-Meth-For1* 5'-AGG AGG ATA TGG TTA TTT GTG TT-3'

*Nctc1-En-Meth-Rev1* 5'-TAA AAA ACA TTA CCC TTC TCT CT-3'

*Nctc1-En-Bis-For2* 5'-GGA TGG TAG GAA TGT TTT TTA TT-3'

*Nctc1-En-Meth-Rev2* 5'-AAT ATC TCT TCT CAA TCC CTT T-3'

**Supplemental Figure 1.** RNA stability for *H19*, *Igf2* and *Nctc1*. After 24 hours in differentiation media (see Methods), primary myoblasts (C/C) were treated with 5mg/ml of actinomycin D. *Igf2*, *H19*, and *Nctc1* RNAs are quantiated relative to *GAPDH* and then normalized to the results at time 0 (no actinomycin D treatment). Normalized to *GAPDH*, steady state mRNA levels for *H19*, *Igf2*, and *Nctc1* are  $2.2 \pm 0.1$ ,  $0.6 \pm 0.1$ , and  $0.0006 \pm 0.0001$ , respectively (n=4, p<0,001 for each pairwise comparison).

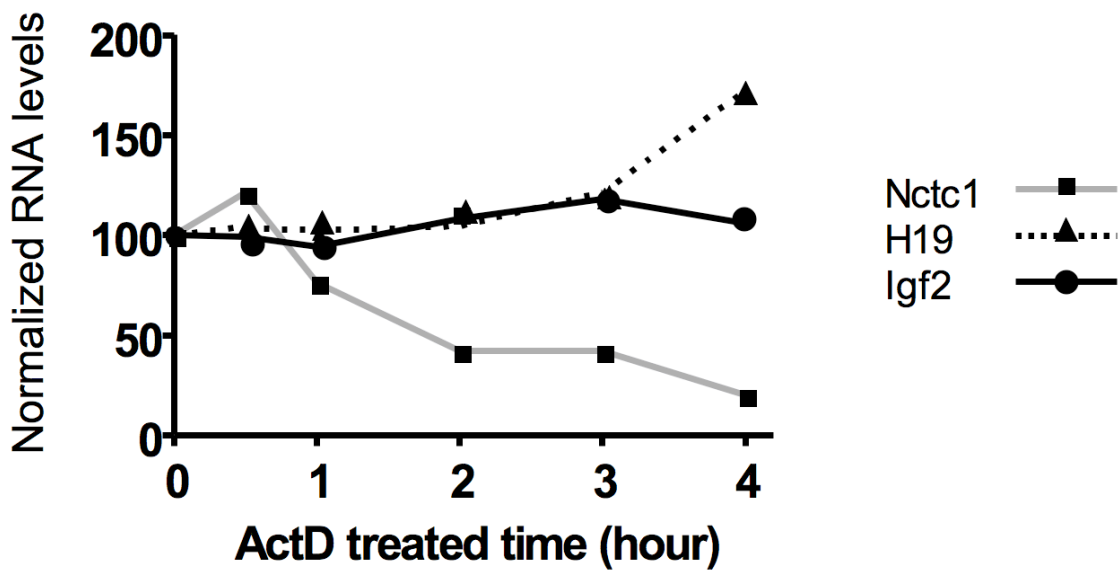

**Supplemental Figure 2.** 3C analysis of the *Igf2/H19/Nctc1* locus. Top line depicts the 150 kb region with key regulatory elements: promoters, green pennants; H19ICR, oval; endodermal enhancer, black circle; and core muscle enhancer, red circle. Critical *Bam*HI and *Bgl*II sites are indicated above and below the line, respectively. PCR primers are shown with black arrowheads. Primer sequences are given in Table S1. Bottom panels indicate the PCR amplicons analyzed in the 3C study. RFLPs distinguishing castaneus (C) and domesticus (D) chromosomes are indicated (\*).

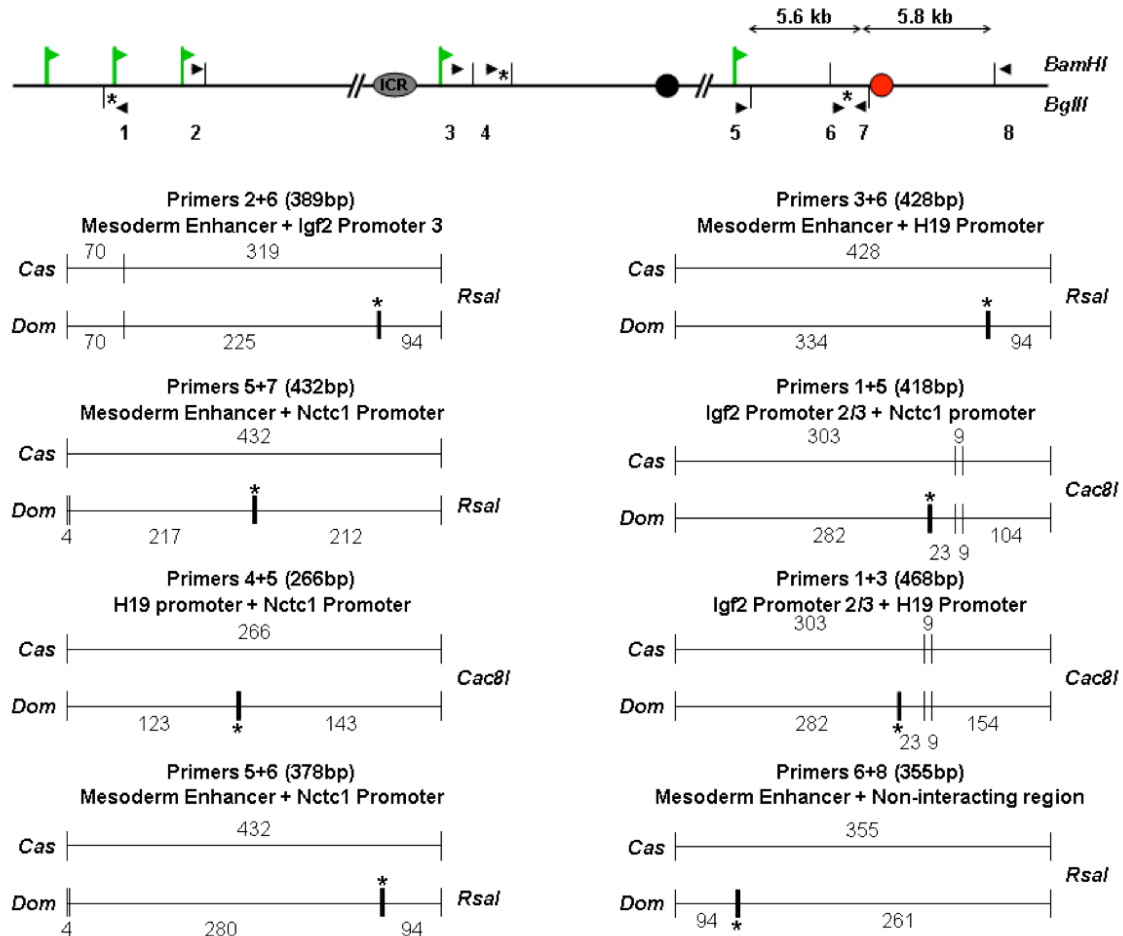

**Supplemental Figure 3.** Specificity of enhancer interactions detected by 3C. Top Panel, 3C was used to detect interactions between the core muscle enhancer (primer 6) and the *Igf2* Promoter 3 (primer 2), the *H19* Promoter (primer 3), the *Nctc1* Promoter (primer 5), or a region 5.8 kb downstream (primer 8). Primers 5 and 8 are equidistant from primer 6 but but DNA interactions are detected only using primer 5. (See Fig. S1 for primer locations and Table S1 for primer sequences.) Bottom Panel, To control for primer efficiency, these same primer pair combinations (Core enhancer + *Igf2* Promoter, + *H19* promoter, + *Nctc1* promoter or + *Nctc1* downstream DNA) were tested on Bacterial Artificial Chromosome (BAC) DNAs. Non-overlapping BACs 198J15 and 11301 together cover the entire locus from upstream of *Ins2* to 100 kb downstream of *Nctc1*(Gould and Pfeifer 1998). These BAC DNAs were purified and quantitated by real time PCR and equimolar quantities were digested, ligated, and analyzed by PCR as described (Palstra et al. 2003).

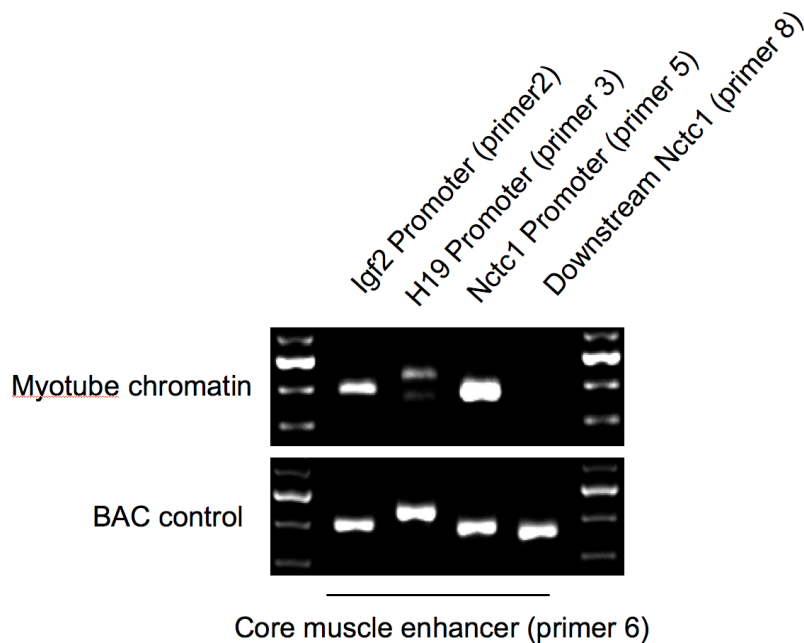

#### Supplemental Figure 4.

**A**

#### Nctc1 RNA melting curves

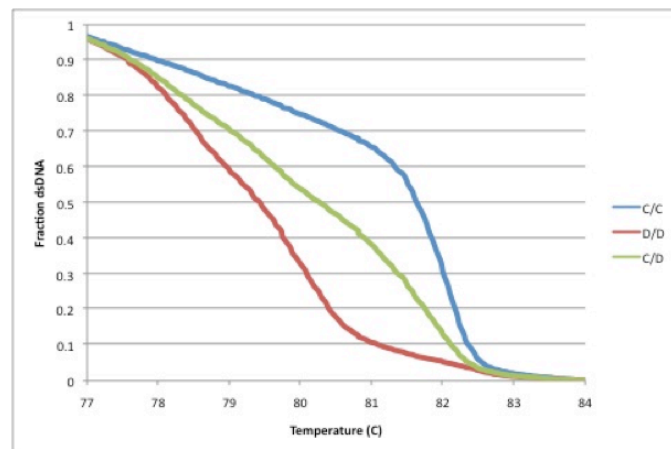

Demonstration of allele-specific assays for *Nctc1* RNA. The relative fraction of *Nctc1* RNA coming from the maternal or paternal chromosome was determined using melting analyses for *Nctc1* RNA. (A) *Melting curves*

**B**

#### Nctc 1 hnRNA Assay Verification

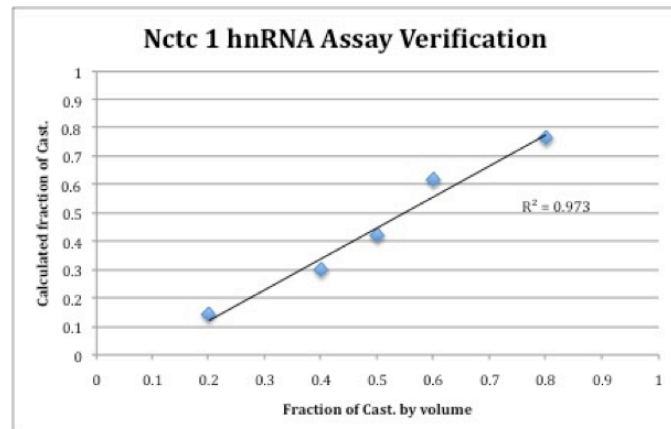

*used to quantify allele-specific expression.*

Melting curves were generated for Castaneus (blue curves) and Domesticus (red curves)

alleles and for 50:50 Castaneus/Domesticus mixtures as described in Methods.

(B) *Verification of allele-specific assays.* Different volume mixtures of pure Castaneus (C/C) and Domesticus (D/D) samples were made and analyzed by the allele-specific assays. The calculated fractions were compared to the known compositions to verify that the two values were well correlated.

**Supplemental Figure 5.** CpG methylation at the *Nctc1* locus. Genomic imprinting is often associated with parent-of-origin specific CpG methylation. We scanned the 13 kb *Nctc1* locus plus 10 kb of additional downstream and upstream sequence for CpG rich elements and identified a single weak CpG island. The 260 bp island carries 12 CpGs and is entirely within the CME. Although not a CpG island, we also looked at the sequences just upstream of *Nctc1* exon 1. This presumptive promoter has been identified by 5' RACE, is the most highly conserved part of the entire *Nctc1* locus, and carries 5 CpGs within the first 250 bp. For both the CpG island/CME and the *Nctc1* promoter, DNA methylation was analyzed by bisulfite sequencing using an SNP to distinguish parental origin. (A, B) The methylation status of 5 CpG dyads within the exon. Maternal (A) methylation =  $3.1 \pm 0.6$  residues and paternal (B) methylation =  $2.9 \pm 1.2$  residues ( $p = 0.5$ , student's t test). (C, D) The methylation status of 8 of 12 CpG dyads within the weak CpG island overlapping the core muscle enhancer were also analyzed. Maternal (C) methylation =  $0 \pm 0$  residues and paternal (D) methylation =  $0.3 \pm 0.5$  residues ( $p = 0.1$ ).

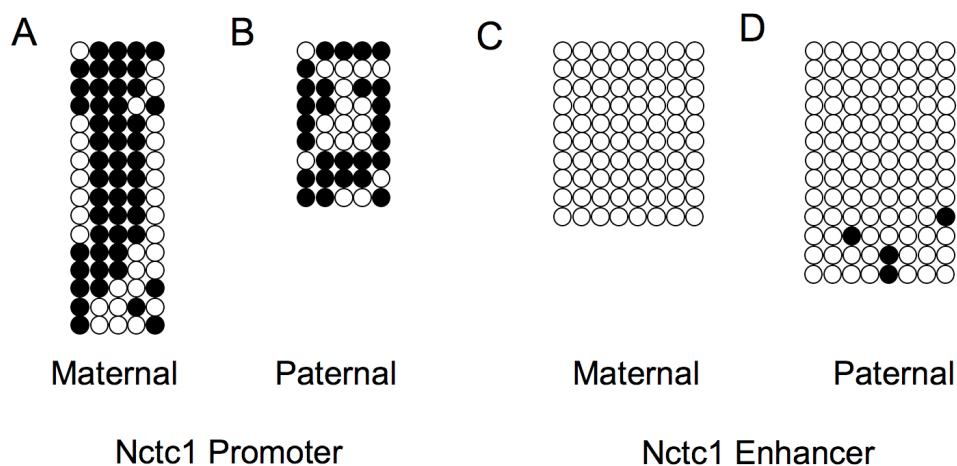

Supplement: supp_gks1182_nar-02412-x-2012-File003.pdf [file supp_gks1182_nar-02412-x-2012-File003.pdf]
